# Supplementary material for: Type-B response regulators of rice play key roles in growth, development, and cytokinin signaling
Source: Oxford University Press journal article supplement (doi:10.1242/dev.174870), 2019-01-01
Supplement: dev174870supp.pdf [file dev174870supp.pdf]

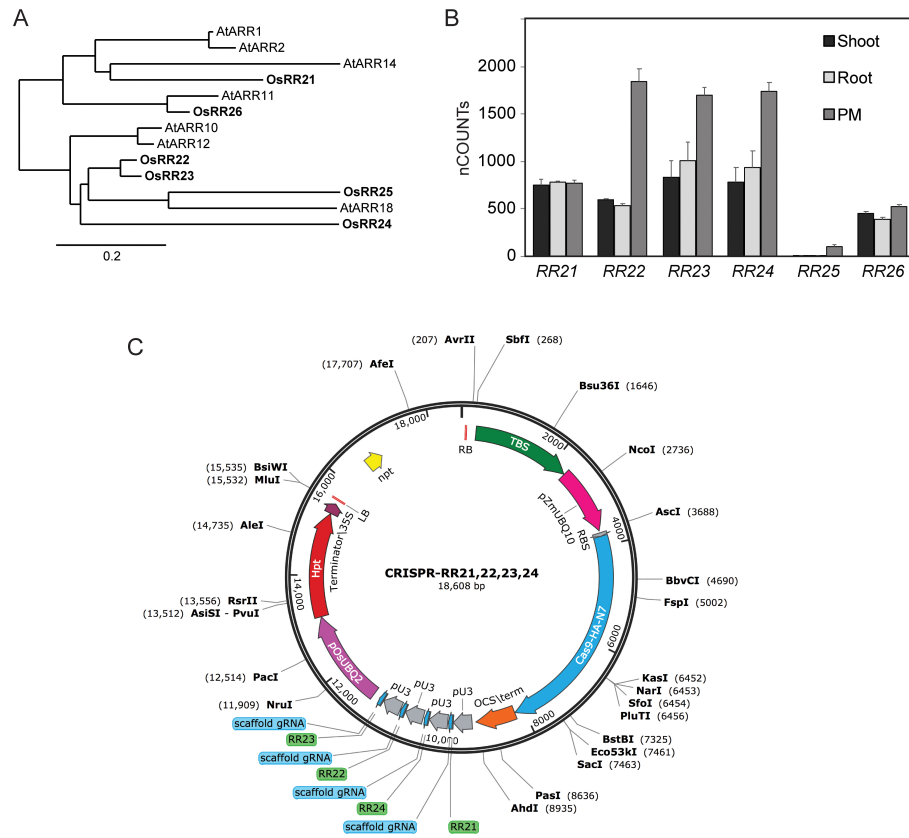

**Fig. S1.** Targeting of rice type-B RRs by a CRISPR/Cas9 approach. **A**, Subfamily-1 of the type-B RRs from rice and Arabidopsis. A phylogeny based on the receiver domains was constructed using the default parameters of the phylogeny.fr pipeline (Dereeper et al., 2008), with alignment performed using MUSCLE 3.8.31 and refined with Gblocks 0.91b, phylogeny using maximum likelihood with PhyML 3.1/3.0 (aLRT), and tree rendering with TreeDyn 198.3. Sequences from rice are in bold and designated with the prefix Os; sequences from Arabidopsis are designated with the prefix At. The nomenclature for rice and Arabidopsis RRs is as described (Schaller et al., 2008; Tsai et al., 2012). “A complete phylogenetic tree for the response regulators of rice and Arabidopsis can be found in Tsai et al. (2012).” **B**, Expression of rice type-B RRs based on Nanostring analysis. The average gene expression value is given in normalized nCounts for roots, shoots, and early panicle meristems (PM) based on published data (Tsai et al., 2012; Yamburenko et al., 2017). Error bars represent SE. **C**, Diagram of CRISPR/Cas9 construct used for targeting *RR21*, *RR22*, *RR23*, and *RR24* of rice. The T-DNA portion of the vector incorporates a transformation booster sequence (TBS) and a plant-codon-optimized HA-tagged nuclear-localized Cas9 gene (Cas9-HA-N7), driven by the *Z. mays UBQ10* promoter and containing a ribosomal binding site (RBS). The vector also incorporates a kanamycin resistance gene (Npt) for bacterial selection on its backbone, and a hygromycin resistance gene (Hpt) driven by the rice *UPQ2* promoter for selection in rice on the T-DNA. The four sgRNAs driven by rice *U3* promoters to target *RR21*, *RR22*, *RR23*, and *RR24* were introduced into a Gateway site by recombination.

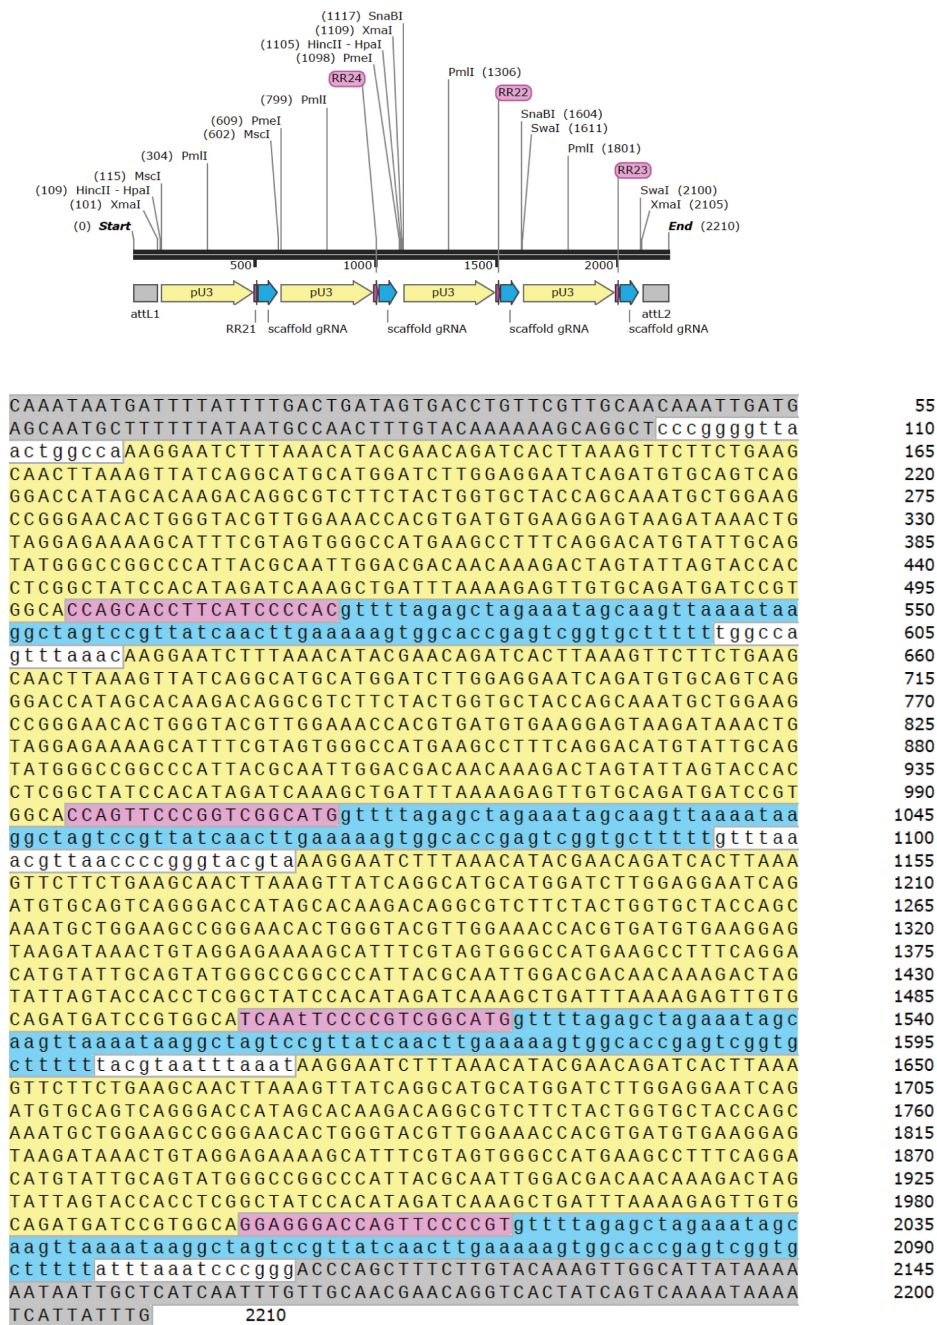

**Fig. S2.** Map and sequence for the CRISPR insert targeting *RR21*, *RR22*, *RR23*, and *RR24*. The same colors used to indicate portions of the insert in the map (top) are used to highlight the sequence (bottom).

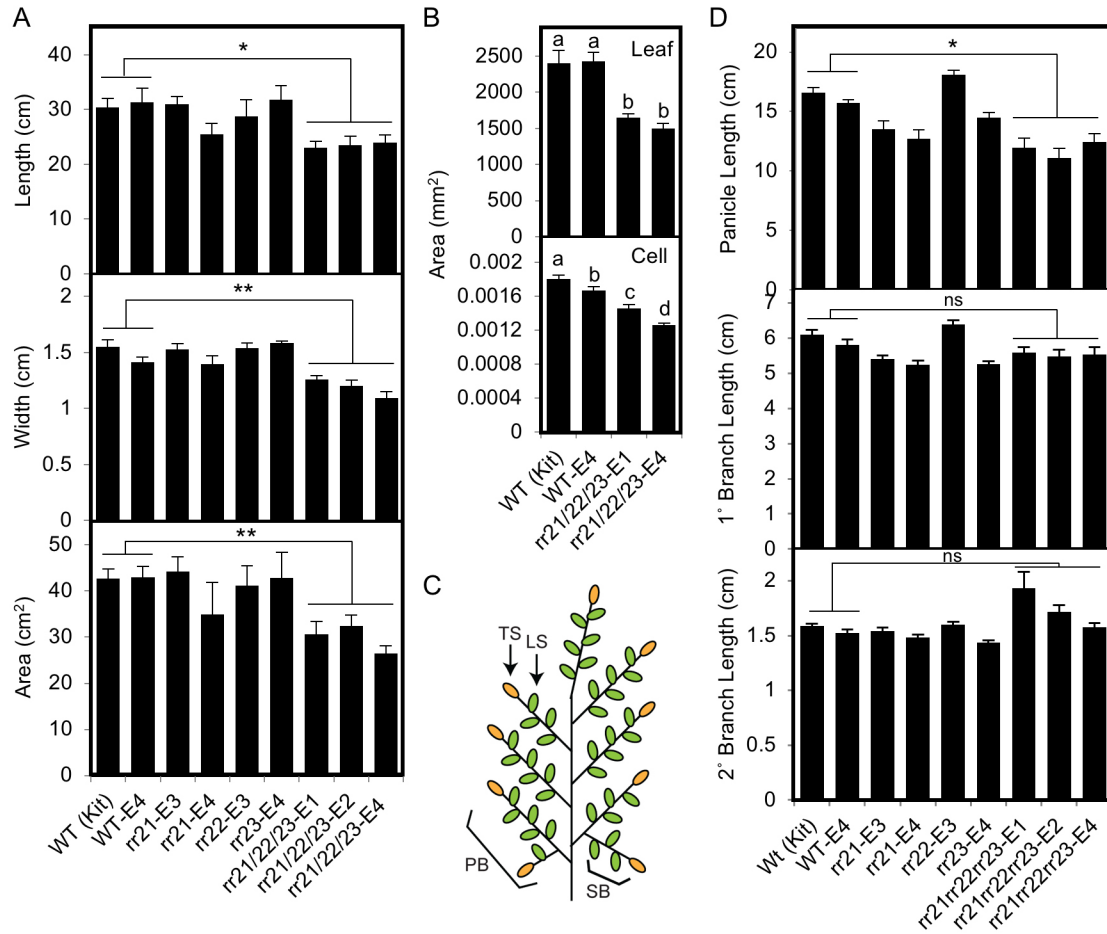

**Fig. S3.** Leaf and panicle phenotypes of type-B *RR* mutants. **A**, Flag leaf length, width, and area for wild type, single, and triple *RR* mutant lines. **B**, Flag leaf area and cell area for experiment shown in Fig. 1C. Different letters indicate significant difference,  $P < 0.05$ . **C**, Illustration showing panicle characteristics, including primary branch (PB), secondary branch (SB), lateral spikelet (LS), and terminal spikelet (TS). **D**, Panicle length, primary branch length, and secondary branch length for the experiment shown in Fig. 1D. For data comparison of *rr21/22/23* lines to wild type, ANOVA analysis was performed with post hoc Holm multiple comparison calculation (\* $P < 0.05$ , \*\* $P < 0.01$ ; ns = not significant at  $P_{0.05}$ ; error bars = SE).

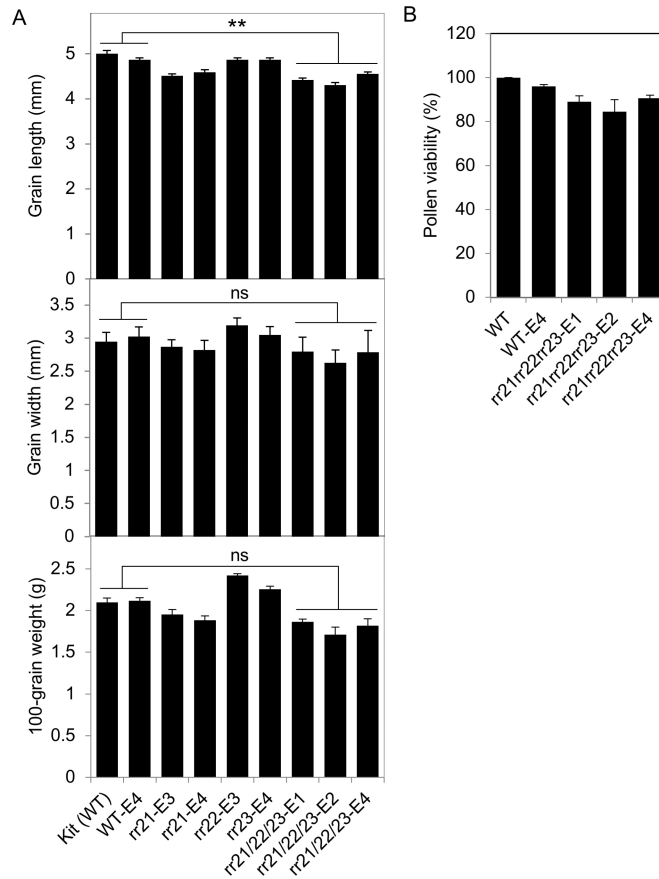

**Fig. S4.** Fertility and trichome related phenotypes of *rr21/22/23*. **A**, Grain length, width, and 100-grain weight. For data comparison of *rr21/22/23* lines to wild type, ANOVA analysis was performed with post hoc Holm multiple comparison calculation (\*\* $P < 0.01$ ; ns = not significant at  $P_{0.05}$ ; error bars = SE). **B**, Pollen viability of *rr21/22/23* lines compared to the wild type.

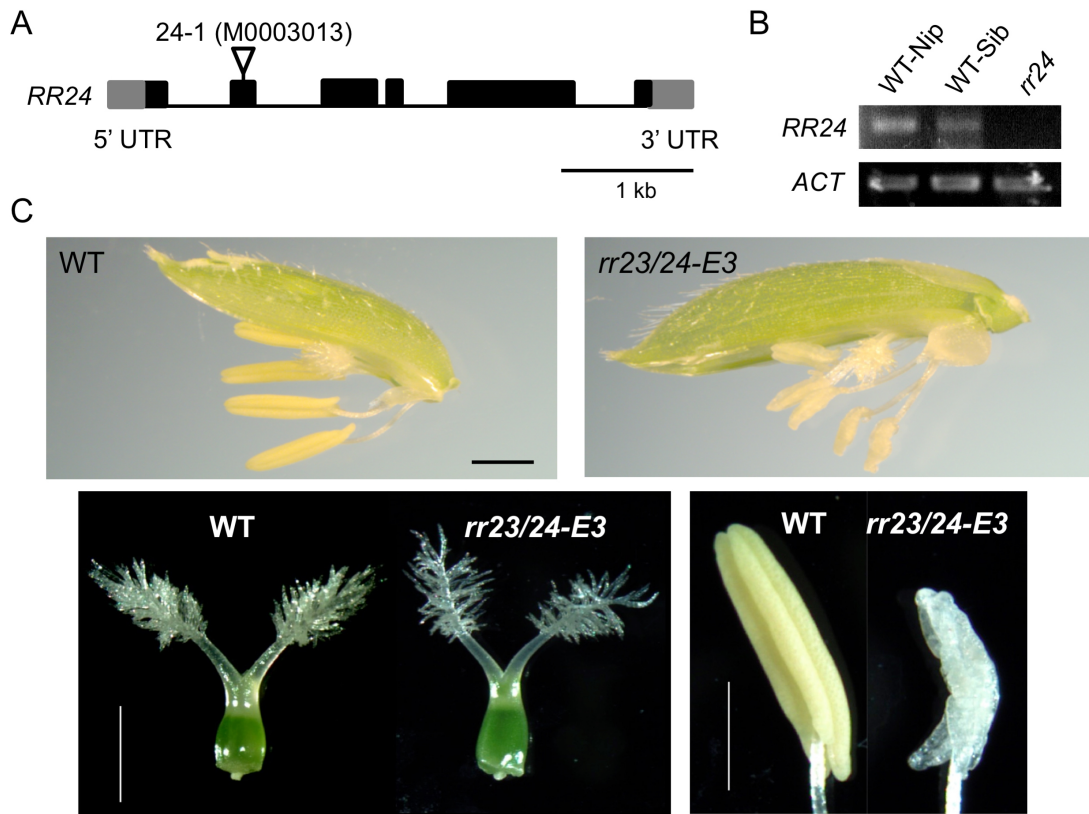

**Fig. S5.** Characterization of *rr24* mutants. **A**, Diagram of T-DNA insertion site of *rr24-1*. **B**, RT-PCR demonstrating lack of full-length transcript for the *rr24* T-DNA insertion mutant. Actin (*ACT*) is the control. **C**, The CRISPR/Cas9-generated *rr23/24* mutant exhibits defective anther development. Scale bars = 1 mm.

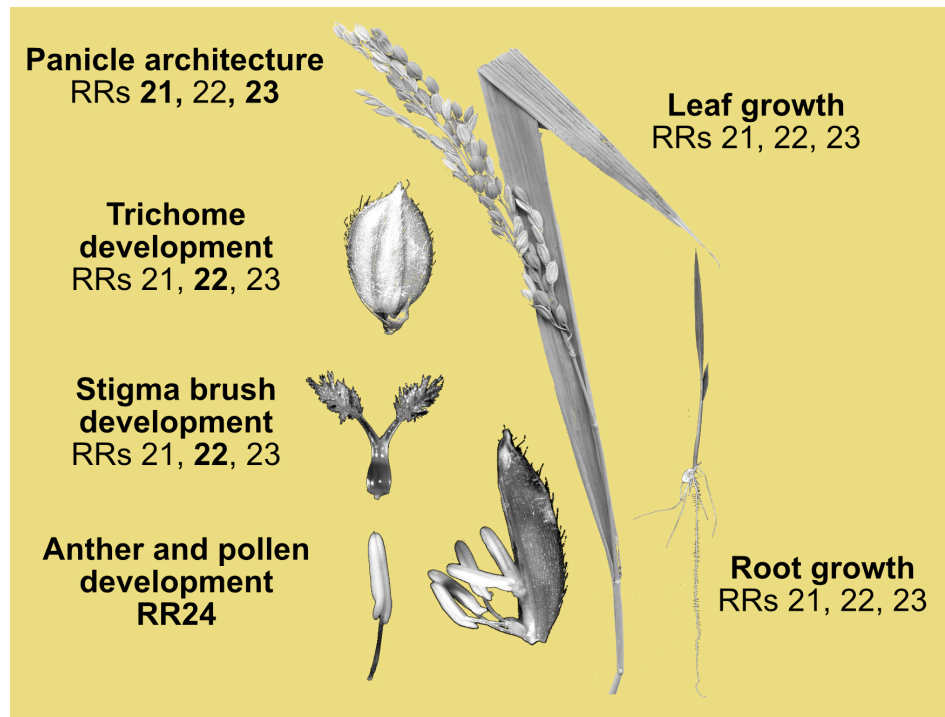

**Fig. S6.** Developmental roles of type-B RRs in rice. Type-B RRs implicated in each role by genetic analysis are indicated, with major contributors in bold.

Table S1. CRISPR/Cas9 induced mutations

| Gene        | Genotype                                                       | Target Sequence (5' - 3') <sup>1</sup> |
|-------------|----------------------------------------------------------------|----------------------------------------|
| <b>RR21</b> | WT                                                             | CGTGGGGATGAAGGTGCTGG                   |
|             | 1-bp insertion (G) Event 1                                     | CGTG <b>G</b> GGGATGAAGGTGCTGG         |
|             | 1-bp insertion (T) Event 2                                     | CGTG <b>T</b> GGGATGAAGGTGCTG          |
|             | 1-bp insertion (C) Event 3                                     | CGTG <b>C</b> GGGATGAAGGTGCTG          |
|             | 13-bp deletion (GGGATGAAGGTGC)/6-bp insertion (CCACCA) Event 4 | CGTGG <b>CCACCA</b> <i>AAGGTGTGG</i>   |
| <b>RR22</b> | WT                                                             | ATCAATCCCCGTCGGCATG                    |
|             | 1-bp insertion (A) Event 2                                     | ATCAATCCC <b>A</b> CGTCGGCAT           |
|             | 1-bp insertion (C) Event 4                                     | ATCAATCCC <b>C</b> CGTCGGCAT           |
|             | 1-bp insertion (T) Events 1 and 3                              | ATCAATCCC <b>T</b> CGTCGGCAT           |
| <b>RR23</b> | WT                                                             | AGGAGGGACCAGTTCCCCGT                   |
|             | 1-bp insertion (A) Events 1, 2, and 4                          | AGGAGGGACCAGTTCCC <b>A</b> CG          |
|             | 1-bp deletion (C) Events 3 and 4                               | AGGAGGGACCAGTTCCC <b>CGT</b>           |
| <b>RR24</b> | WT                                                             | ACCAGTTCCCGGTCGGCATGCGGGTGCT           |
|             | 7-bp deletion (CATGCGG) Event 3                                | ACCAGTTCCCGGTCGG <b>CATGCGG</b> GTGCT  |

<sup>1</sup>Insertions in bold (red); deletions in bold italics (blue)

Table S2. CRISPR/Cas9 lines used in this study

| Genotype-Event (Generation isolated) | rr21                                                      | rr22               | rr23               | rr24                     |
|--------------------------------------|-----------------------------------------------------------|--------------------|--------------------|--------------------------|
| WT-E4                                | (+/+)                                                     | (+/+)              | (+/+)              | (+/+)                    |
| rr21-E3 (T4)                         | (-/-) 1-bp ins (C)                                        | (+/+)              | (+/+)              | (+/+)                    |
| rr21-E4 (T4)                         | (-/-) 13-bp del (GCACCTTCATCCC) / 6-bp insertion (CCACCA) | (+/+)              | (+/+)              | (+/+)                    |
| rr22-E3 (T3)                         | WT                                                        | (-/-) 1-bp ins (T) | WT                 | (+/+)                    |
| rr23-E4 (T2)                         | WT                                                        | (+/+)              | (-/-) 1-bp del (C) | (+/+)                    |
| rr21/22/23-E1 (T2)                   | (-/-) 1-bp del (G)                                        | (-/-) 1-bp ins (T) | (-/-) 1-bp ins (A) | (+/+)                    |
| rr21/22/23-E2 (T3)                   | (-/-) 1-bp ins (T)                                        | (-/-) 1-bp ins (A) | (-/-) 1-bp ins (A) | (+/+)                    |
| rr21/22/23-E4 (T4)                   | (-/-) 13-bp del (GCACCTTCATCCC) / 6-bp insertion (CCACCA) | (-/-) 1-bp ins (C) | (-/-) 1-bp ins (A) | (+/+)                    |
| rr23/24-E3 (T2)                      | (+/+)                                                     | (+/+)              | (-/-) 1-bp del (C) | (+/-) 7-bp del (CATGCGG) |

**Table S3. Primers used in this study**

| Gene                | Forward primer (5' to 3') | Reverse primer (5' to 3') |
|---------------------|---------------------------|---------------------------|
| Genotyping primers  |                           |                           |
| <i>RR21</i>         | TTTTCGGTTTCGTGGGCG        | CGACTCCTCCCCAACCC         |
| <i>RR22</i>         | ATGCTTCTGGGTGCTTTGAG      | GCCAAGTATGCTAGTATCAGTGA   |
| <i>RR23</i>         | TGAATCCCAATCTTCCCCTG      | CAGCTTCTTTCTTTCCATTTTGC   |
| <i>RR24</i>         | TGTTTCTTGGGTGCTTGGAG      | GGTCAGCAGAAGATAATCCTTACA  |
| <i>HygR</i>         | GCCGCGCTCCCGATTCCGGA      | GCTCGAAGTAGCGCGTCTGCT     |
| <i>RR24 (T-DNA)</i> | TTGCACACATGGTGGTTGTGT     | TCCATCTCGAGGCCGACAAGC     |
| <i>pTAG4-RB</i>     | ACTCATGGCGATCTCTTACC      |                           |
| qPCR primers        |                           |                           |
| <i>RR6</i>          | CATCACCGACTACTGGATGC      | GGGATCTCCTTGAGCTGAGA      |
| <i>RR9/10</i>       | TCATGAGGACAGCCCAATTTCTA   | TGCAGTAGTCTGTGATGATCAGGTT |
| <i>CKX5</i>         | CCCCATGAACAGGCACAAGT      | GAGGATCTCCCGGTTCTGCC      |
| <i>GL3a</i>         | CCAGCAGCAGCGAAAAATACA     | GAAGCCGTCCTTCCAAGTCA      |
| <i>HOX2</i>         | TCGCCATGACAACTTGGGA       | TCCCCTCCTCTTGAGTGATT      |
| <i>NPR5/BOP1</i>    | TTCGGGAAGATGAACGACGG      | GAAGCCATGTGGGGAGAACA      |
| <i>EXPA6</i>        | AAATCCCTACGCAGTGCCAG      | TTGGGGTAGTTTGGTGCGTT      |
| <i>WDA1</i>         | AACACTTACCGCTGTGGAGG      | TAGGCAACGAGCTCAGCAAA      |
| <i>GH3.1</i>        | CTCCATACCGCTGCCTACAT      | TTGTGCTCCCTGGATTTCCGG     |
| <i>SAUR54</i>       | CGCTTCGAGGTTCCACTGAT      | TCAGGAGCGCCTTCTCAATC      |
| <i>WOX3B</i>        | CACGCTAATTCCCTTCTCTC      | TAGTAGTAGCTGGTGGTGTA      |
| <i>HL6</i>          | ACCTGTGGGACAATAGCTGC      | AGTGATCAACAATGTAACGTCCA   |
| <i>UBQ5</i>         | ACCACTTCGACCGCCACTACT     | ACGCCTAAGCCTGCTGGTT       |



## References

- Dereeper, A., Guignon, V., Blanc, G., Audic, S., Buffet, S., Chevenet, F., Dufayard, J. F., Guindon, S., Lefort, V., Lescot, M., et al.** (2008). Phylogeny.fr: robust phylogenetic analysis for the non-specialist. *Nucleic Acids Res* **36**, W465-469.
- Schaller, G. E., Kieber, J. J. and Shiu, S.-H.** (2008). Two-component signaling elements and histidyl-aspartyl phosphorelays. *The Arabidopsis Book* (C. Somerville, E. Meyerowitz, editors) **6**, e0112.
- Tsai, Y. C., Weir, N. R., Hill, K., Zhang, W., Kim, H. J., Shiu, S. H., Schaller, G. E. and Kieber, J. J.** (2012). Characterization of genes involved in cytokinin signaling and metabolism from rice. *Plant Physiol* **158**, 1666-1684.
- Yamburenko, M. V., Kieber, J. J. and Schaller, G. E.** (2017). Dynamic patterns of expression for genes regulating cytokinin metabolism and signaling during rice inflorescence development. *PLoS One* **12**, e0176060.
